# Supplementary material for: Spectroscopic and theoretical investigation of the [Fe2(bdt)(CO)6] hydrogenase mimic and some catalyst intermediates
Source: Royal Society of Chemistry journal article supplement (doi:10.1039/c9cp01393h), 2019-01-01
Supplement: c9cp01393h1.pdf [file c9cp01393h1.pdf]

# Supporting Information

## **Spectroscopic and Theoretical Investigation of Early Intermediates in Biomimetic Hydrogenase Catalyst [Fe<sub>2</sub>(bdt)(CO)<sub>6</sub>]**

J.P.H. Oudsen<sup>a</sup>, B. Venderbosch<sup>a</sup>, T.J. Korstanje<sup>a</sup>, D.J. Martin<sup>a</sup>, J.N. Reek<sup>b</sup>  
and M. Tromp<sup>a</sup>

<sup>a</sup>. Sustainable Materials and Characterization, van 't Hoff Institute for Molecular Sciences, University of Amsterdam, Science Park 904, 1098 XH Amsterdam, The Netherlands; [Moniek.Tromp@rug.nl](mailto:Moniek.Tromp@rug.nl)

<sup>b</sup>. Homogeneous, Supramolecular and Bio-Inspired Catalysis, van 't Hoff Institute for Molecular Sciences, University of Amsterdam, Science Park 904, 1098 XH Amsterdam, The Netherlands.

## 1. XANES analysis

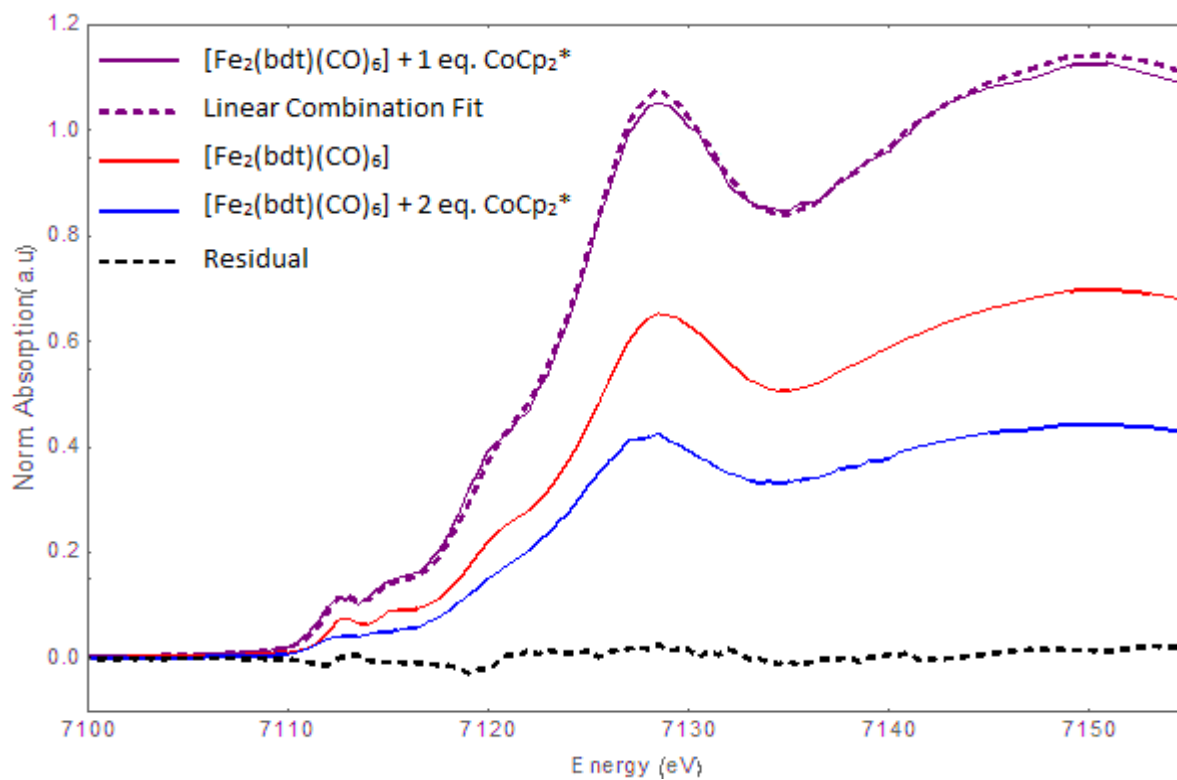

Figure 1. Linear Combination fitting of the XANES region of  $[\text{Fe}_2(\text{bdt})(\text{CO})_6]$  with 1 eq. of reducing agent  $\text{CoCp}_2^*$  with the standards  $[\text{Fe}_2(\text{bdt})(\text{CO})_6]$  and  $[\text{Fe}_2(\text{bdt})(\text{CO})_6]$  with 2 eq  $\text{CoCp}_2^*$ .

| Standard                                                        | Weight (error)         |
|-----------------------------------------------------------------|------------------------|
| $[\text{Fe}_2(\text{bdt})(\text{CO})_6] + \text{Precursor}$     | 0.604 (0.038)          |
| $[\text{Fe}_2(\text{bdt})(\text{CO})_6] + 2\text{eq. CoCp}_2^*$ | <u>0.396</u> + (0.044) |
| Sum                                                             | 1.000                  |

Linear combination fit of  $[\text{Fe}_2(\text{bdt})(\text{CO})_6]$  with 1 eq  $\text{CoCp}_2^*$  as flattened  $\mu(E)$  from 7104.5 to 7154.5 eV.  
 Weights forced between 0 and 1 with no overall  $E_0$  shift.  
 R-factor = 0.0008029 Reduced chi-square = 0.0001356.

## 2. EXAFS analysis

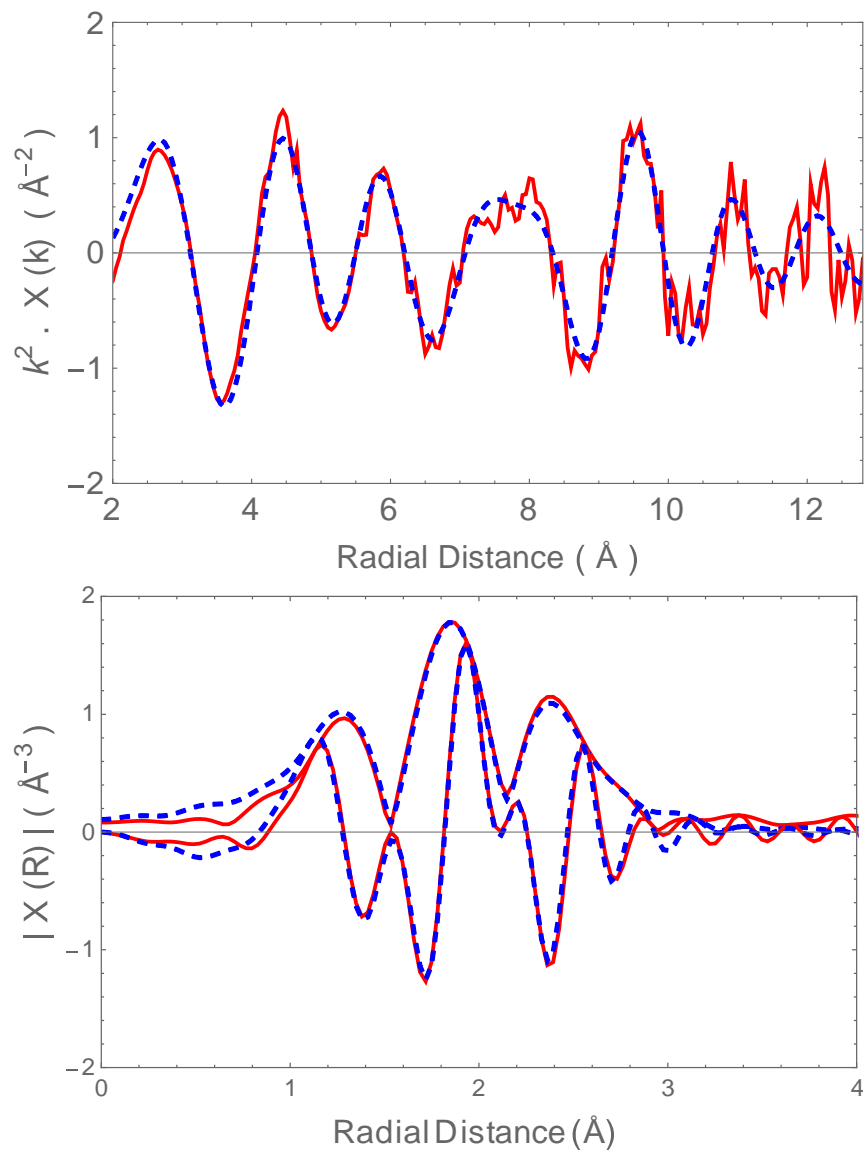

Figure 2. (Top)  $k^2$ -weighted Fe K-edge EXAFS data of  $[\text{Fe}_2(\text{bdt})(\text{CO})_6]$  with 1 eq. of reducing agent  $\text{CoCp}_2^*$  with the corresponding fit. (Bottom)  $k^2$ -weighted Fourier Transforms of the EXAFS data for  $2 < k < 12 \text{\AA}$  of [1] (left) and [1]<sup>2-</sup> (right). In all plots the data are represented by the solid lines (red), whereas the corresponding fits are the dotted lines (blue).

**Table 1.** Fe K-edge EXAFS fitting parameters for  $[\text{Fe}_2(\text{bdt})(\text{CO})_6]$  with 1 eq.  $\text{CoCp}_2^*$ , where N = coordination number,  $\sigma^2$  = Debye Waller factor [ $\text{\AA}^{-2}$ ], R = fitted bond length [ $\text{\AA}$ ].

| <i>Sample</i>                                                       | <i>Shell</i> | <i>N</i> | $\sigma^2$ | <i>R<sub>fit</sub></i> ( $\text{\AA}$ ) |
|---------------------------------------------------------------------|--------------|----------|------------|-----------------------------------------|
| $[\text{Fe}_2(\text{bdt})(\text{CO})_6 + 1 \text{ eq. CoCp}_2^*]^a$ | Fe - C       | 2.5      | 0.001(1)   | 1.79(1)                                 |
|                                                                     | Fe - S       | 1.75     | 0.003(3)   | 2.28(2)                                 |
|                                                                     | Fe - Fe      | 1.0      | 0.004(4)   | 2.45(3)                                 |
|                                                                     | Fe - O       | 3.0      | 0.002(5)   | 2.97(6)                                 |
|                                                                     | Fe - CO      | 5.5      | 0.001(3)   | 2.97(6)                                 |
|                                                                     | Fe - COC     | 2.5      | 0.003(3)   | 2.97(6)                                 |

<sup>a</sup>k range = 2 – 12  $\text{\AA}$ , R range = 1 – 3.2  $\text{\AA}$ ; k-weighted fit = 1,2,3  $E_0$  = -2.6(8) eV,  $S_0^2$  = 0.90. R-factor fit: 0.0188,

\* fixed value

## 2. Computational Methods

All geometry optimizations and IR calculations were conducted using ADF<sup>1,2</sup> with the TZ2P basis set and BP86<sup>3</sup> or OPBE<sup>4</sup> functional. COSMO solvent models were carried out employing acetonitrile.<sup>5</sup> Transition States were located using a linear transit method,<sup>6</sup> all validated by one single negative infrared frequency. TD-DFT XANES calculations were performed with a 50 Davidson excitation restriction window where only singlet Quadrupole and Dipole Allowed transitions are selected from the irons 1s orbitals.<sup>7,8</sup> In all TD-DFT calculations, B3LYP – d3 and a QZ4P Slater-type basis set was applied.<sup>9</sup> The intensities include second-order contributions due to the magnetic-dipole and electric-quadrupole transition moments.<sup>10</sup> The spectra were shifted by 151.0 eV for comparison to experiment. These shifts are chosen such that the energy of the first peak in the calculated spectrum agrees with the first peak in the experimental spectrum. While these shifts are rather large, they do not affect the relative position of the peaks.<sup>11</sup>

Iron K-Edge XANES spectra were simulated with FEFF9.<sup>12,13</sup> These XANES calculations were carried out using both the crystallographic and DFT geometry optimized coordinates. In all cases a Hedin–Lundqvist potential was utilized.<sup>14</sup> The many-body reduction factor ( $S_0^2$ ) was kept at 1.0. The default core-hole broadening (1/3 of the energy step) was utilized for spectral plots, with no additional experimental broadening.

### 3. Coordinates of calculated structures

All coordinates are shown for OPBE basis set in combination with a (Acetonitrile) COSMO solvent model.

#### [Fe<sub>2</sub>(bdt)(CO)<sub>6</sub>]

| ATOMS | X       | Y       | Z       | Angstroms |
|-------|---------|---------|---------|-----------|
| 1 Fe  | 2.2329  | 0.4814  | 3.5393  |           |
| 2 Fe  | 4.1595  | 1.3408  | 2.2345  |           |
| 3 S   | 2.5512  | 2.6846  | 3.087   |           |
| 4 S   | 2.3452  | 0.3795  | 1.2736  |           |
| 5 C   | 2.7498  | 0.7886  | 5.2143  |           |
| 6 O   | 3.104   | 1.0115  | 6.271   |           |
| 7 C   | 2.6567  | -1.2537 | 3.62    |           |
| 8 O   | 2.9111  | -2.3612 | 3.6512  |           |
| 9 C   | 5.3078  | 1.9108  | 3.4735  |           |
| 10 O  | 6.0382  | 2.2416  | 4.2706  |           |
| 11 C  | 5.1218  | -0.1654 | 2.0661  |           |
| 12 O  | 5.7504  | -1.1149 | 2.0142  |           |
| 13 C  | 0.4463  | 0.3795  | 3.785   |           |
| 14 O  | -0.6657 | 0.2865  | 3.9407  |           |
| 15 C  | 4.7678  | 2.2815  | 0.8283  |           |
| 16 O  | 5.1288  | 2.8486  | -0.0877 |           |
| 17 C  | 1.4817  | 2.8958  | 1.6854  |           |
| 18 C  | 1.3743  | 1.806   | 0.8444  |           |
| 19 C  | 0.5414  | 1.8695  | -0.2584 |           |
| 20 C  | -0.1667 | 3.0184  | -0.496  |           |
| 21 C  | -0.0678 | 4.086   | 0.323   |           |
| 22 C  | 0.7708  | 4.0388  | 1.4489  |           |
| 23 H  | 0.4639  | 1.1415  | -0.8317 |           |

**[Fe<sub>2</sub>(bdt) $\mu$ -CO(CO)<sub>5</sub>]<sup>1-</sup>**

| ATOMS | X        | Y        | Z        | (Angstroms) |
|-------|----------|----------|----------|-------------|
| 1 Fe  | 0.834037 | 0.023193 | -1.00743 |             |
| 2 Fe  | 1.167058 | -2.29226 | 0.053163 |             |
| 3 S   | 0.108713 | -0.57673 | 1.001072 |             |
| 4 S   | 2.79997  | 0.647337 | 0.003807 |             |
| 5 C   | 2.400376 | 0.735745 | 1.687844 |             |
| 6 C   | 1.181175 | 0.213777 | 2.151631 |             |
| 7 C   | 0.834658 | 0.287334 | 3.502795 |             |
| 8 C   | 1.710948 | 0.867746 | 4.414175 |             |
| 9 C   | 2.934241 | 1.373512 | 3.96673  |             |
| 10 C  | 3.278864 | 1.31246  | 2.621831 |             |
| 11 C  | -0.54263 | -0.73363 | -1.75367 |             |
| 12 C  | 1.731968 | -0.0783  | -2.50021 |             |
| 13 C  | 0.264122 | 1.664374 | -1.12867 |             |
| 14 C  | 1.986239 | -3.12715 | 1.344653 |             |
| 15 C  | -0.09995 | -3.48926 | -0.12497 |             |
| 16 C  | 2.126662 | -2.86696 | -1.28828 |             |
| 17 O  | -1.46783 | -1.17215 | -2.30082 |             |
| 18 O  | 2.305901 | -0.09823 | -3.5079  |             |
| 19 O  | -0.13689 | 2.745434 | -1.25798 |             |
| 20 O  | 2.523883 | -3.76208 | 2.163887 |             |
| 21 O  | -0.8631  | -4.36655 | -0.23088 |             |
| 22 O  | 2.746668 | -3.35886 | -2.14671 |             |
| 23 H  | -0.12044 | -0.11686 | 3.836388 |             |
| 24 H  | 1.440698 | 0.928609 | 5.467023 |             |
| 25 H  | 3.624496 | 1.833652 | 4.673417 |             |
| 26 H  | 4.229504 | 1.721203 | 2.282368 |             |

Transition state from  $[\text{Fe}_2(\text{bdt})(\text{CO})_6]^{1-} \rightarrow [\text{Fe}_2(\text{bdt})\mu\text{-CO}(\text{CO})_5]^{1-}$

| ATOMS | X        | Y        | Z        | (Angstroms) |
|-------|----------|----------|----------|-------------|
| 1 Fe  | 0.544273 | 0.088842 | -0.90344 |             |
| 2 Fe  | 1.477808 | -2.15455 | -0.12212 |             |
| 3 S   | 0.026865 | -0.75849 | 1.117265 |             |
| 4 S   | 2.627281 | 0.398829 | 0.034342 |             |
| 5 C   | 2.291953 | 0.612849 | 1.731562 |             |
| 6 C   | 1.096633 | 0.078751 | 2.243475 |             |
| 7 C   | 0.801639 | 0.180283 | 3.601973 |             |
| 8 C   | 1.69106  | 0.822831 | 4.462863 |             |
| 9 C   | 2.883746 | 1.345544 | 3.962019 |             |
| 10 C  | 3.188284 | 1.2367   | 2.607054 |             |
| 11 C  | -1.12069 | -0.03787 | -1.42673 |             |
| 12 C  | 1.136174 | -0.89046 | -2.26096 |             |
| 13 C  | 0.620422 | 1.74387  | -1.45488 |             |
| 14 C  | 2.052514 | -2.99364 | 1.305767 |             |
| 15 C  | 0.293844 | -3.39905 | -0.63672 |             |
| 16 C  | 2.839354 | -2.74425 | -1.10409 |             |
| 17 O  | -2.22763 | -0.08125 | -1.79093 |             |
| 18 O  | 1.342836 | -1.26512 | -3.3525  |             |
| 19 O  | 0.67719  | 2.838119 | -1.86108 |             |
| 20 O  | 2.417627 | -3.61262 | 2.225118 |             |
| 21 O  | -0.34382 | -4.31775 | -0.97024 |             |
| 22 O  | 3.711073 | -3.2593  | -1.68368 |             |
| 23 H  | -0.12644 | -0.2451  | 3.982482 |             |
| 24 H  | 1.450497 | 0.914467 | 5.521869 |             |
| 25 H  | 3.582224 | 1.851184 | 4.629437 |             |
| 26 H  | 4.118494 | 1.64825  | 2.217035 |             |

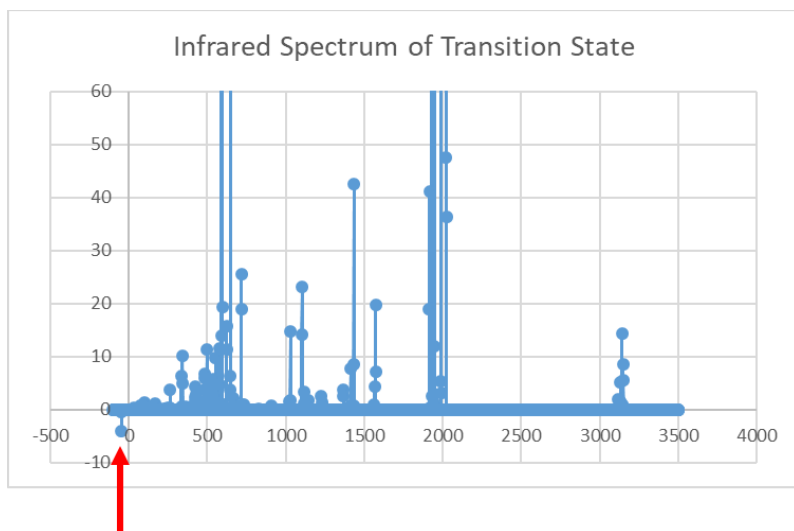



**[Fe<sub>2</sub>(bdt)(CO)<sub>6</sub>]<sup>1-</sup>**

| ATOMS | X        | Y        | Z        | (Angstroms) |
|-------|----------|----------|----------|-------------|
| 1 Fe  | 0.247387 | 0.798281 | 1.578172 |             |
| 2 Fe  | 0.018122 | -1.48473 | 0.346721 |             |
| 3 S   | 0.825926 | 0.523666 | -0.59419 |             |
| 4 S   | -1.83904 | 1.230572 | 0.890531 |             |
| 5 C   | -0.52044 | 1.213856 | -1.51657 |             |
| 6 C   | -2.69514 | 2.210773 | -2.9429  |             |
| 7 C   | -1.72709 | 1.476586 | -0.84304 |             |
| 8 C   | -0.40033 | 1.459832 | -2.885   |             |
| 9 C   | -1.48396 | 1.967746 | -3.60056 |             |
| 10 C  | -2.81976 | 1.957504 | -1.57965 |             |
| 11 H  | 0.558873 | 1.245292 | -3.38541 |             |
| 12 H  | -1.38495 | 2.171586 | -4.67887 |             |
| 13 H  | -3.77005 | 2.147881 | -1.05341 |             |
| 14 H  | -3.558   | 2.606461 | -3.50367 |             |
| 15 C  | 1.660705 | 1.77247  | 1.90839  |             |
| 16 O  | 2.59369  | 2.437766 | 2.132743 |             |
| 17 C  | -0.30951 | 0.907113 | 3.237574 |             |
| 18 O  | -0.65808 | 0.992134 | 4.347754 |             |
| 19 C  | 1.1022   | -0.85418 | 1.916489 |             |
| 20 O  | 1.853356 | -1.33779 | 2.700516 |             |
| 21 C  | -0.73452 | -2.59835 | 1.492493 |             |
| 22 O  | -1.20551 | -3.37518 | 2.222125 |             |
| 23 C  | -1.2852  | -1.69805 | -0.88959 |             |
| 24 O  | -2.09661 | -1.97151 | -1.67546 |             |
| 25 C  | 1.260417 | -2.59617 | -0.24545 |             |
| 26 O  | 2.035212 | -3.38617 | -0.61407 |             |

**[Fe<sub>2</sub>(bdt) $\mu$ -CO(CO)<sub>5</sub>]<sup>2-</sup>**

|    | ATOMS | X       | Y       | Z       | (Angstroms) |
|----|-------|---------|---------|---------|-------------|
| 1  | Fe    | 0.2028  | 0.0665  | 0.5594  |             |
| 2  | Fe    | 2.582   | -0.1034 | -0.4246 |             |
| 3  | S     | 1.6359  | 1.9626  | -0.1182 |             |
| 4  | S     | 1.9621  | 0.0453  | -2.6526 |             |
| 5  | C     | 1.2402  | 2.5373  | -1.7214 |             |
| 6  | C     | 0.4012  | 3.4248  | -4.2824 |             |
| 7  | C     | 1.2199  | 1.6522  | -2.837  |             |
| 8  | C     | 0.8323  | 3.8659  | -1.9297 |             |
| 9  | C     | 0.4266  | 4.3167  | -3.1828 |             |
| 10 | C     | 0.7897  | 2.1013  | -4.09   |             |
| 11 | H     | 0.8348  | 4.5489  | -1.0615 |             |
| 12 | H     | 0.121   | 5.3696  | -3.3141 |             |
| 13 | H     | 0.7752  | 1.3845  | -4.9308 |             |
| 14 | H     | 0.0653  | 3.7652  | -5.277  |             |
| 15 | C     | -0.9608 | 0.1895  | -0.8193 |             |
| 16 | O     | -1.852  | 0.1267  | -1.5847 |             |
| 17 | C     | -0.319  | -1.561  | 0.9284  |             |
| 18 | O     | -0.7299 | -2.6228 | 1.2377  |             |
| 19 | C     | -0.5292 | 0.9254  | 1.9117  |             |
| 20 | O     | -1.108  | 1.3855  | 2.8335  |             |
| 21 | C     | 2.9254  | -1.8157 | -0.5284 |             |
| 22 | O     | 3.2153  | -2.9579 | -0.5761 |             |
| 23 | C     | 4.2358  | 0.3858  | -0.1702 |             |
| 24 | O     | 5.3661  | 0.6576  | 0.0477  |             |
| 25 | C     | 1.9401  | -0.4311 | 1.3503  |             |
| 26 | O     | 2.3793  | -0.8293 | 2.3933  |             |

## 4. Redox potentials

Redox potentials were determined using the Born–Haber cycle approach<sup>15</sup>, seen in scheme 1. By applying formula 1, the change in free energy of the redox process in solution can be obtained.<sup>16</sup> Now by the use of formula 2, the standard absolute redox potential ( $E^0$ ) can be calculated, where  $F$  is the Faraday constant (23.061 kcal per volt gram equivalent) and  $Z$  equals 1.0 (one-electron redox processes).<sup>16</sup>

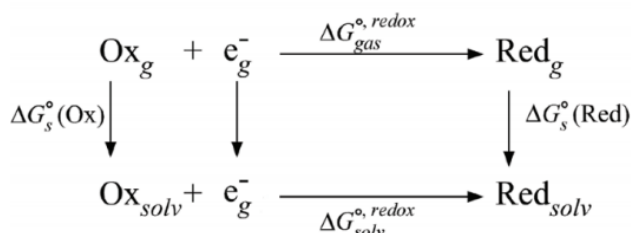

**Scheme 1.** Born Haber Cycle used for the calculation of redox potentials

$$E^0 = \frac{-\Delta G^{\circ}(\text{soln, redox})}{ZF} \quad (1)$$

$$-\Delta G^{\circ}(\text{soln, redox}) = \Delta G^{\circ}(\text{gas, redox}) + \Delta G^{\circ}(\text{solv}, [\text{Fe}_2(\text{bdt})(\text{CO})_6]^{-1}) - \Delta G^{\circ}(\text{solv}, [\text{Fe}_2(\text{bdt})(\text{CO})_6]) \quad (2)$$

The tables below show the calculated parameters needed for the redox potentials. Table 2 gives the results in case of OPBE as basis set whereas table 3 represents the calculated parameters using BP86 as basis set.

**Table 2.** Redox parameters calculated using an OPBE basis set.

| Starting product                                           | Final product                                              | $\Delta G^{\circ}$ (gas, redox) (kcal/mol) | $\Delta G^{\circ}$ (solution, redox) (kcal/mol) | $\Delta G^{\circ}$ (solv, $[\text{Fe}_2(\text{bdt})(\text{CO})_6]^{-n}$ ) (kcal/mol) | $\Delta G^{\circ}$ (solv, $[\text{Fe}_2(\text{bdt})(\text{CO})_6]^{-(n+1)}$ ) (kcal/mol) | Redox Potential (eV) |
|------------------------------------------------------------|------------------------------------------------------------|--------------------------------------------|-------------------------------------------------|--------------------------------------------------------------------------------------|------------------------------------------------------------------------------------------|----------------------|
| $[\text{Fe}_2(\text{bdt})(\text{CO})_6]$                   | $[\text{Fe}_2(\text{bdt})(\text{CO})_6]^{-1}$              | -44.2                                      | -78.70                                          | -38.56                                                                               | -4.06                                                                                    | -1.59                |
| $[\text{Fe}_2(\text{bdt})(\text{CO})_6]$                   | $[\text{Fe}_2(\text{bdt})\mu\text{CO}-(\text{CO})_5]^{-1}$ | -43.55                                     | -78.66                                          | -39.17                                                                               | -4.06                                                                                    | -1.59                |
| $[\text{Fe}_2(\text{bdt})(\text{CO})_6]^{-1}$              | $[\text{Fe}_2(\text{bdt})\mu\text{CO}-(\text{CO})_5]^{-2}$ | 19.31                                      | -89.23                                          | -147.10                                                                              | -38.56                                                                                   | -1.13                |
| $[\text{Fe}_2(\text{bdt})\mu\text{CO}-(\text{CO})_5]^{-1}$ | $[\text{Fe}_2(\text{bdt})\mu\text{CO}-(\text{CO})_5]^{-2}$ | 18.66                                      | -89.27                                          | -147.10                                                                              | -39.17                                                                                   | -1.13                |

**Table 3.** Redox parameters calculated using BP86 as basis set.

| Starting product                                           | Final product                                              | $\Delta G^{\circ}$ (gas, redox) (kcal/mol) | $\Delta G^{\circ}$ (solution, redox) (kcal/mol) | $\Delta G^{\circ}$ (solv, $[\text{Fe}_2(\text{bdt})(\text{CO})_6]^{-n}$ ) (kcal/mol) | $\Delta G^{\circ}$ (solv, $[\text{Fe}_2(\text{bdt})(\text{CO})_6]^{-(n+1)}$ ) (kcal/mol) | Redox Potential (eV) |
|------------------------------------------------------------|------------------------------------------------------------|--------------------------------------------|-------------------------------------------------|--------------------------------------------------------------------------------------|------------------------------------------------------------------------------------------|----------------------|
| $[\text{Fe}_2(\text{bdt})(\text{CO})_6]$                   | $[\text{Fe}_2(\text{bdt})(\text{CO})_6]^{-1}$              | -50.47                                     | -84.14                                          | -38.17                                                                               | -4.50                                                                                    | -1.41                |
| $[\text{Fe}_2(\text{bdt})(\text{CO})_6]$                   | $[\text{Fe}_2(\text{bdt})\mu\text{CO}-(\text{CO})_5]^{-1}$ | -48.89                                     | -82.01                                          | -37.62                                                                               | -4.50                                                                                    | -1.50                |
| $[\text{Fe}_2(\text{bdt})(\text{CO})_6]^{-1}$              | $[\text{Fe}_2(\text{bdt})\mu\text{CO}-(\text{CO})_5]^{-2}$ | 15.25                                      | -92.11                                          | -145.53                                                                              | -38.17                                                                                   | -1.07                |
| $[\text{Fe}_2(\text{bdt})\mu\text{CO}-(\text{CO})_5]^{-1}$ | $[\text{Fe}_2(\text{bdt})\mu\text{CO}-(\text{CO})_5]^{-2}$ | 13.67                                      | -94.24                                          | -145.53                                                                              | -37.62                                                                                   | -0.97                |

## 5. TD-DFT XANES calculations

Below are given the SFO of the most contributing molecular orbitals (MO's) in the TD-DFT XANES calculations. The first tables; 105A, 106A, 114A, 126A, 127A, 130A and 141A represent the neutral  $[\text{Fe}_2(\text{bdt})(\text{CO})_6]$  molecule. Whereas the tables; 107A, 108A, 118A, 121A, 122A, 130A and 129A represent the contributions of  $[\text{Fe}_2(\text{bdt})\mu\text{-CO}(\text{CO})_5]^{2-}$ . Each percentage contribution in the table below corresponds to the indicated SFO. In general, a SFO may be a linear combination of several Fragment Orbitals on the same, or on symmetry-related Fragments. Only the first 'member' of such a combination is specified here.

|           |        |                |    |       |        |            |    |
|-----------|--------|----------------|----|-------|--------|------------|----|
| 105A LUMO | 18.66% | 1 D: $x^2-y^2$ | Fe | 106 A | 15.30% | 1 D: $z^2$ | Fe |
|           | 11.29% | 1 D:xy         | Fe |       | 12.47% | 1 D:xz     | Fe |
|           | 6.83%  | 1 D:yz         | Fe |       | 5.26%  | 2 P:x      | S  |
|           | 6.79%  | 2 P:x          | S  |       | 3.52%  | 1 D:xy     | Fe |
|           | 3.42%  | 1 D:xz         | Fe |       | 3.22%  | 1 P:x      | C  |
|           | 3.35%  | 1 D:xz         | Fe |       | 3.14%  | 1 P:x      | C  |
|           | 3.19%  | 2 P:z          | S  |       | 2.85%  | 1 P:x      | C  |
| 114 A     | 13.79% | 1 P:x          | C  | 126 A | 12.72% | 2 S        | H  |
|           | 6.41%  | 1 P:x          | C  |       | 10.30% | 2 S        | H  |
|           | 5.58%  | 1 P:z          | C  |       | 3.91%  | 2 P:y      | C  |
|           | 5.51%  | 1 P:y          | C  |       | 3.74%  | 2 P:z      | S  |
|           | 5.19%  | 1 P:x          | O  |       | 3.73%  | 2 P:y      | S  |
|           | 3.63%  | 1 P:z          | C  |       | 2.96%  | 2 P:y      | C  |
|           | 2.69%  | 1 P:x          | C  |       |        |            |    |
|           | 2.67%  | 1 P:z          | C  |       |        |            |    |
| 127 A     | 5.60%  | 3 S            | O  | 130 A | 7.05%  | 3 S        | O  |
|           | 4.28%  | 3 S            | O  |       | 6.55%  | 3 S        | O  |
|           | 4.20%  | 3 S            | O  |       | 6.39%  | 3 S        | O  |
|           | 4.06%  | 3 S            | O  |       | 5.56%  | 3 S        | O  |
|           | 3.97%  | 3 S            | O  |       | 5.35%  | 2 P:x      | C  |
|           | 3.07%  | 3 S            | O  |       | 5.26%  | 2 P:z      | C  |
|           |        |                |    |       | 4.99%  | 2 P:x      | C  |
| 141A      | 7.99%  | 2 P:x          | O  |       | 4.74%  | 3 S        | O  |
|           | 4.63%  | 2 P:z          | O  |       | 4.57%  | 2 P:z      | C  |
|           | 3.89%  | 2 P:x          | C  |       | 4.45%  | 3 S        | O  |
|           | 3.49%  | 2 P:y          | C  |       | 4.35%  | 2 P:x      | C  |
|           |        |                |    |       | 3.86%  | 2 P:x      | C  |

|           |        |                |    |       |        |                |    |
|-----------|--------|----------------|----|-------|--------|----------------|----|
| 107A LUMO | 9.59%  | 1 D: $x^2-y^2$ | Fe | 108 A | 8.67%  | 1 P:x          | C  |
|           | 7.75%  | 1 D:xy         | Fe |       | 8.58%  | 1 P:x          | C  |
|           | 5.96%  | 1 P:x          | C  |       | 7.03%  | 2 S            | H  |
|           | 4.30%  | 2 P:x          | S  |       | 4.00%  | 1 P:x          | C  |
|           | 3.89%  | 2 S            | H  |       | 3.53%  | 2 S            | H  |
|           | 3.81%  | 2 S            | H  |       | 3.52%  | 1 P:x          | C  |
|           | 3.80%  | 1 P:x          | C  |       | 3.09%  | 1 P:x          | C  |
|           | 3.44%  | 1 P:x          | C  |       | 3.05%  | 1 P:z          | C  |
|           | 3.02%  | 1 P:y          | C  |       |        |                |    |
|           | 3.01%  | 1 P:y          | C  |       |        |                |    |
| 118 A     | 10.71% | 3 S            | O  | 121A  | 12.89% | 1 D: $z^2$     | Fe |
|           | 8.25%  | 1 P:y          | C  |       | 11.92% | 1 P:z          | C  |
|           | 7.83%  | 5 S            | Fe |       | 8.54%  | 1 P:y          | C  |
|           | 4.87%  | 1 D: $x^2-y^2$ | Fe |       | 5.86%  | 1 P:x          | C  |
|           | 3.59%  | 3 S            | O  |       | 5.63%  | 1 P:x          | C  |
|           | 3.55%  | 2 P:x          | C  |       | 3.92%  | 1 P:z          | C  |
|           | 3.14%  | 3 S            | O  |       | 3.02%  | 1 D:xy         | Fe |
| 122 A     | 27.70% | 1 P:z          | C  | 129 A | 5.48%  | 3 S            | O  |
|           | 9.49%  | 1 P:z          | O  |       | 4.30%  | 3 S            | O  |
|           | 6.00%  | 1 P:z          | C  |       | 4.30%  | 1 D: $x^2-y^2$ | Fe |
|           | 5.76%  | 1 D:xz         | Fe |       | 3.71%  | 1 P:y          | C  |
|           | 5.51%  | 1 P:z          | C  |       | 3.63%  | 1 D: $x^2-y^2$ | Fe |
|           |        |                |    |       | 3.61%  | 2 S            | C  |
|           |        |                |    |       | 3.20%  | 1 P:z          | C  |

# 6. $^1\text{H}$ – and $^{13}\text{C}$ – NMR spectrum of $[\text{Fe}_2(\text{bdt})(\text{CO})_6]$

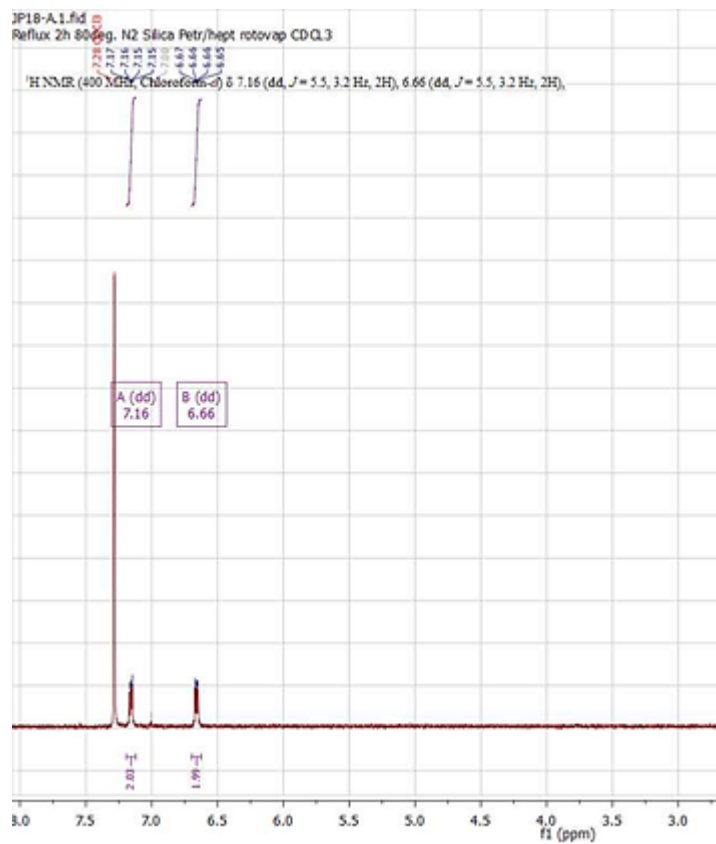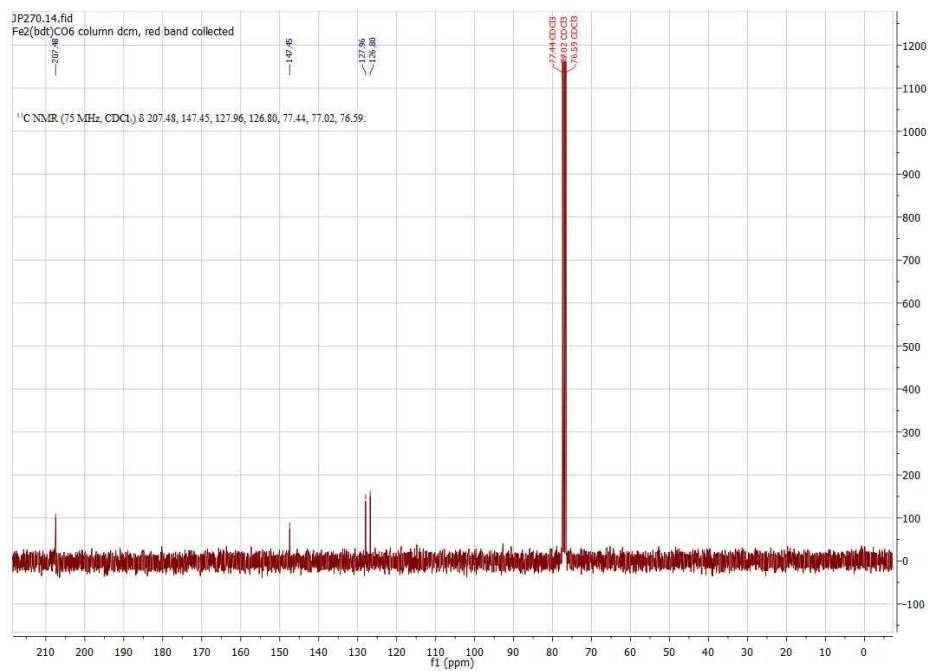

## 7. References

- (1) G. te Velde, F.M. Bickelhaupt, E.J. Baerends, C.F. Guerra, J.A. Gisbergen, G. Snijders and T. Ziegler, *J. of Comput. Chem.*, 2001, **22**, 931-967.
- (2) C. Fonseca Guerra, J.G. Snijders, G. te Velde, E.J. Baerends, *Theor. Chem. Acc.* 1998, **101**, 391-403.
- (3) A.D. Becke, *Phys. Rev. A*, 1988, **38**, 3098-3100.
- (4) J.P. Perdew, *Phys. Rev. B*, 1986, **33**, 8822-8824.
- (5) C.C. Pye and T. Ziegler, *Theor. Chem. Acc.* 1999, **101**, 396-408.
- (6) L. Fan and T. Ziegler, *J. Am. Chem. Soc.*, 1992, **114**, 10890-10897.
- (7) A.J. Atkins, M. Bauer and C.R. Jacob, *Phys. Chem. Chem. Phys.*, 2015, **17**, 13937-13948.
- (8) M. Stener, G. Fronzoni, and M. de Simone, *Chem. Phys. Letters*, 2003, **373**, 115-123.
- (9) E. van Lenthe and E.J. Baerends, *J. of Comp. Chem.* 2003, **24**, 1142-1156.
- (10) S. Bernadotte and A.J. Atkins, *J Chem. Phys.*, 2012, **137**, 204106.
- (11) S. DeBeer George, T. Petrenko and F. Neese, *J. Phys. Chem. A* 2008, **112**, 12936-12943.
- (12) J. Li, C.L. Fisher, J.L. Chen, D. Bashford and L. Noodleman, *Inorg. Chem.* 1996, **35**, 4694-4702.
- (13) L.E. Roy, E. Jakubikova, M.G. Guthrie, and E.R. Batista, *J. Phys. Chem. A*, 2009, **113**, 6745-6750.
- (14) J.J. Rehr, J.J. Kas, F.D. Vila, M.P. Prange, and K. Jorissen, *Phys. Chem. Chem. Phys.*, 2010, **12**, 5503-5513.
- (15) J.J. Rehr, J.J. Kas, M.P. Prange, A.P. Sorini, Y. Takimoto, and F. Vila, *C.R. Physique*, 2009, **10**, 548-559.
- (16) L. Hedin and S. Lundqvist, *J. Phys. C: Solid State Phys.*, 1971, **4**, 2064-2083.
